# Supplementary material for: Controlling the microstructure of resorcinol–furfural aerogels and derived carbon aerogels via the salt templating approach
Source: PubMed Central journal article supplement — RSC Adv. 2019 Feb 18;9(11):5967–77. doi: 10.1039/c9ra00238c (PMC9060908; doi:10.1039/c9ra00238c), 2019-02-18
Supplement: RA-009-C9RA00238C-s001.pdf [file RA-009-C9RA00238C-s001.pdf]

## **Supporting Information**

### **Controlling the microstructure of resorcinol-furfural aerogels and derived carbon aerogels via salt templating approach**

Haiming Zhang, Junzong Feng\*, Liangjun Li, Yonggang Jiang, Jian Feng\*

Science and Technology on Advanced Ceramic Fibers and Composites Laboratory,  
National University of Defense Technology, Deyu Road 109, Changsha, 410073,  
Hunan, China

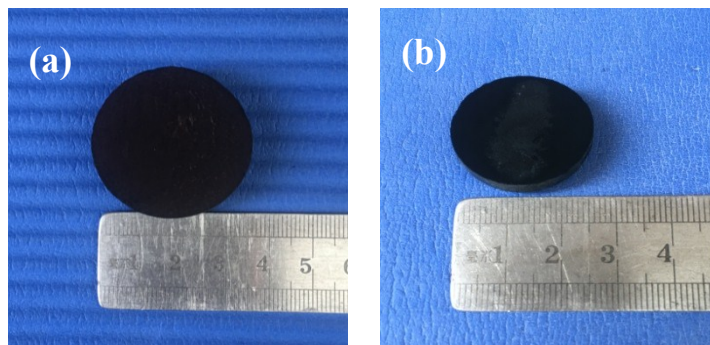

**Fig. S1.** Photos of RF aerogel (a) and derived carbon aerogel (b) synthesized by salt template

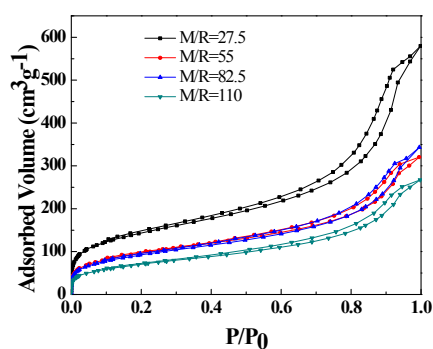

**Fig. S2.** The nitrogen adsorption isotherms of the RF aerogels synthesized by various M/R ratios. The Z/R ratio is kept constant as 6.48.

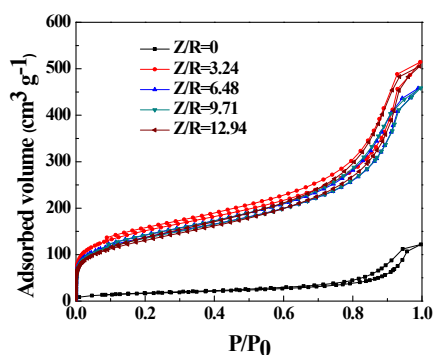

**Fig. S3.** The nitrogen adsorption isotherms of RF aerogels synthesized by various Z/R ratios. The M/R ratio is kept constant as 40.

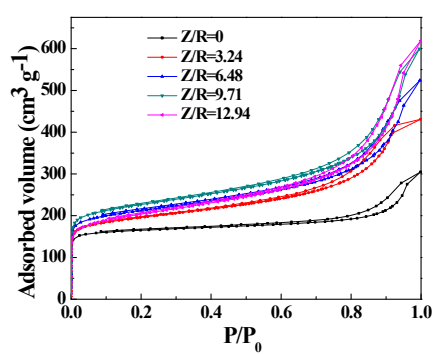

**Fig. S4.** The nitrogen sorption isotherms of carbon aerogels synthesized by various Z/R ratios. The M/R ratio is kept constant as 40.

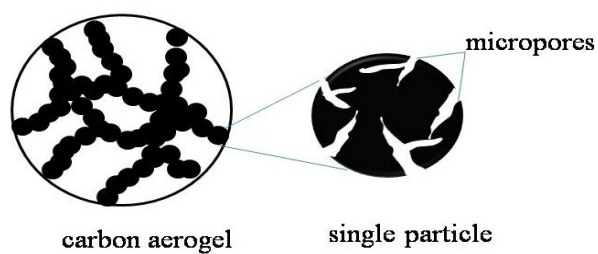

**Fig. S5.** Formation of micropores by skeleton particles

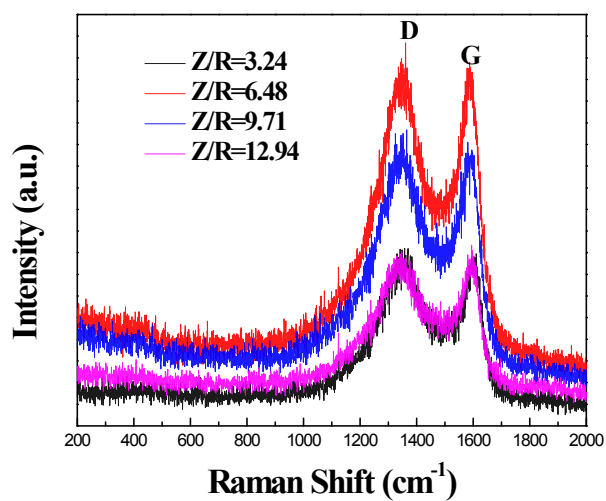

**Fig. S6.** Raman spectra of carbon aerogels synthesized by various Z/R ratios

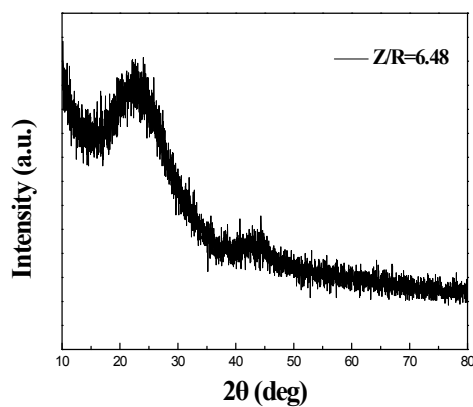

**Fig. S7.** XRD pattern of carbon aerogel synthesized by salt template

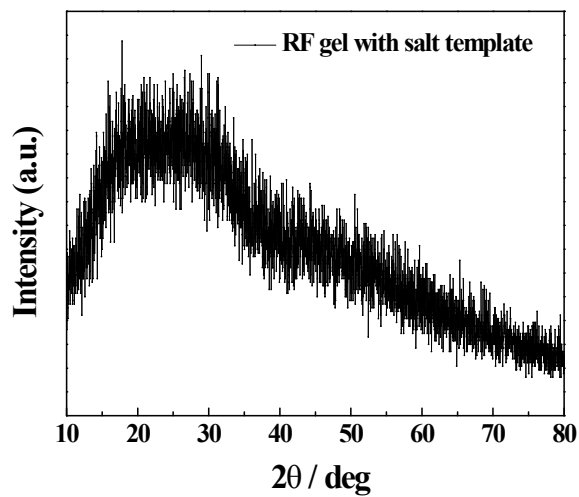

**Fig. S8.** XRD pattern of RF gel with salt template

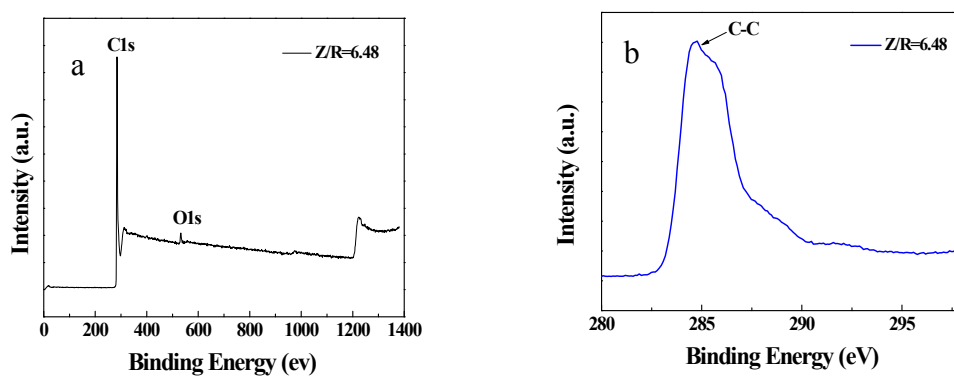

**Fig. S9.** Broad XPS spectra (a) and C 1s spectra (b) of as-prepared carbon aerogel

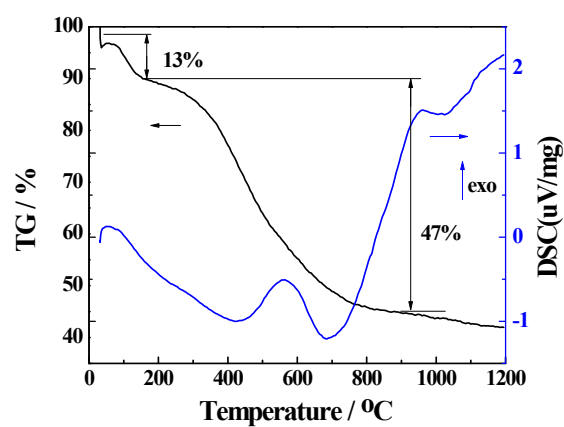

**Fig. S10.** TG-DSC curves of RF aerogel in argon atmosphere
